# Supplementary material for: Enhanced Therapeutic Efficacy and Memory of Tumor-Specific CD8 T Cells by Ex Vivo PI3K-δ Inhibition
Source: Oxford University Press journal article supplement (doi:10.1158/0008-5472.can-16-1925), 2017-06-14
Supplement: 00085472can161925-sup-169095_3_supp_4043408_cq2hcf.docx [file 00085472can161925-sup-169095_3_supp_4043408_cq2hcf.docx]

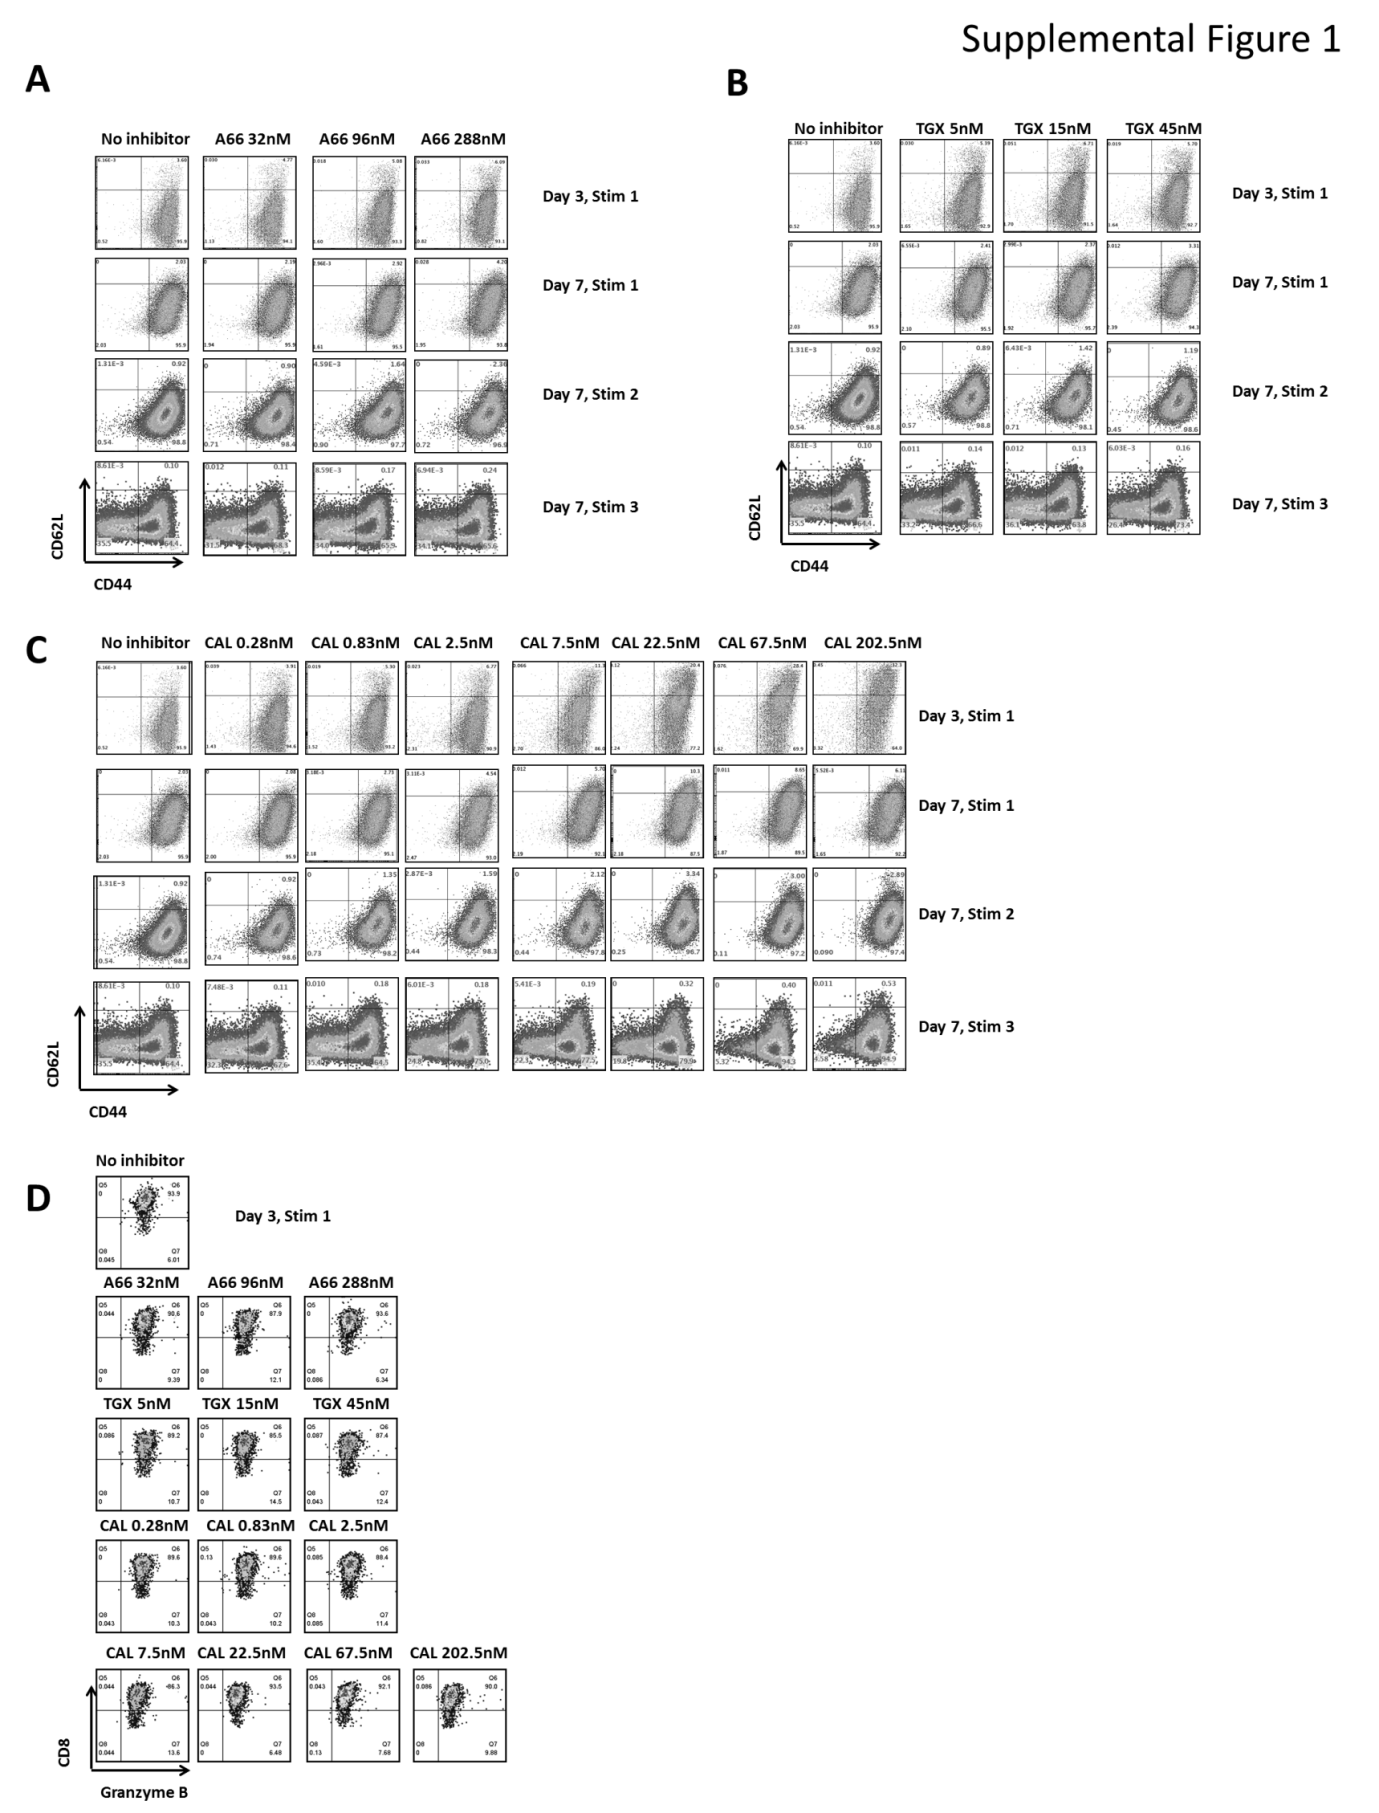


**Supplemental Figure 1:** PI3K-δ, but not PI3K-α or PI3K-β inhibition preserves the memory phenotype. Non-fractionated splenocytes from pMel-1 mice were activated with gp10025-33 peptide (1µM) in the presence or absence of A66 (32, 96 and 288nM), TGX-221 (5, 15 and 45nM) or CAL-101(0,28, 0.83, 2.5, 7.5, 22.5, 67.5 or 202.5nM). The gated cells were viable (7AAD-) CD8+Vβ13+.

1. PI3K-α inhibition does not affect the CD8+ T-cell phenotype at all the tested concentrations.
2. PI3K-β inhibition does not affect the CD8+ T-cell phenotype at all the tested concentrations.
3. PI3K-δ inhibition preserves the memory phenotype in a concentration dependent manner.
4. The ability of CD8+ T-cells to produce Granzyme B was not affected by the inhibition of any of the PI3K isoforms at any concentration.
