# Supplementary material for: Enhanced Therapeutic Efficacy and Memory of Tumor-Specific CD8 T Cells by Ex Vivo PI3K-δ Inhibition
Source: Oxford University Press journal article supplement (doi:10.1158/0008-5472.can-16-1925), 2017-06-14
Supplement: 00085472can161925-sup-169095_3_supp_4043409_sq2hcf.docx [file 00085472can161925-sup-169095_3_supp_4043409_sq2hcf.docx]

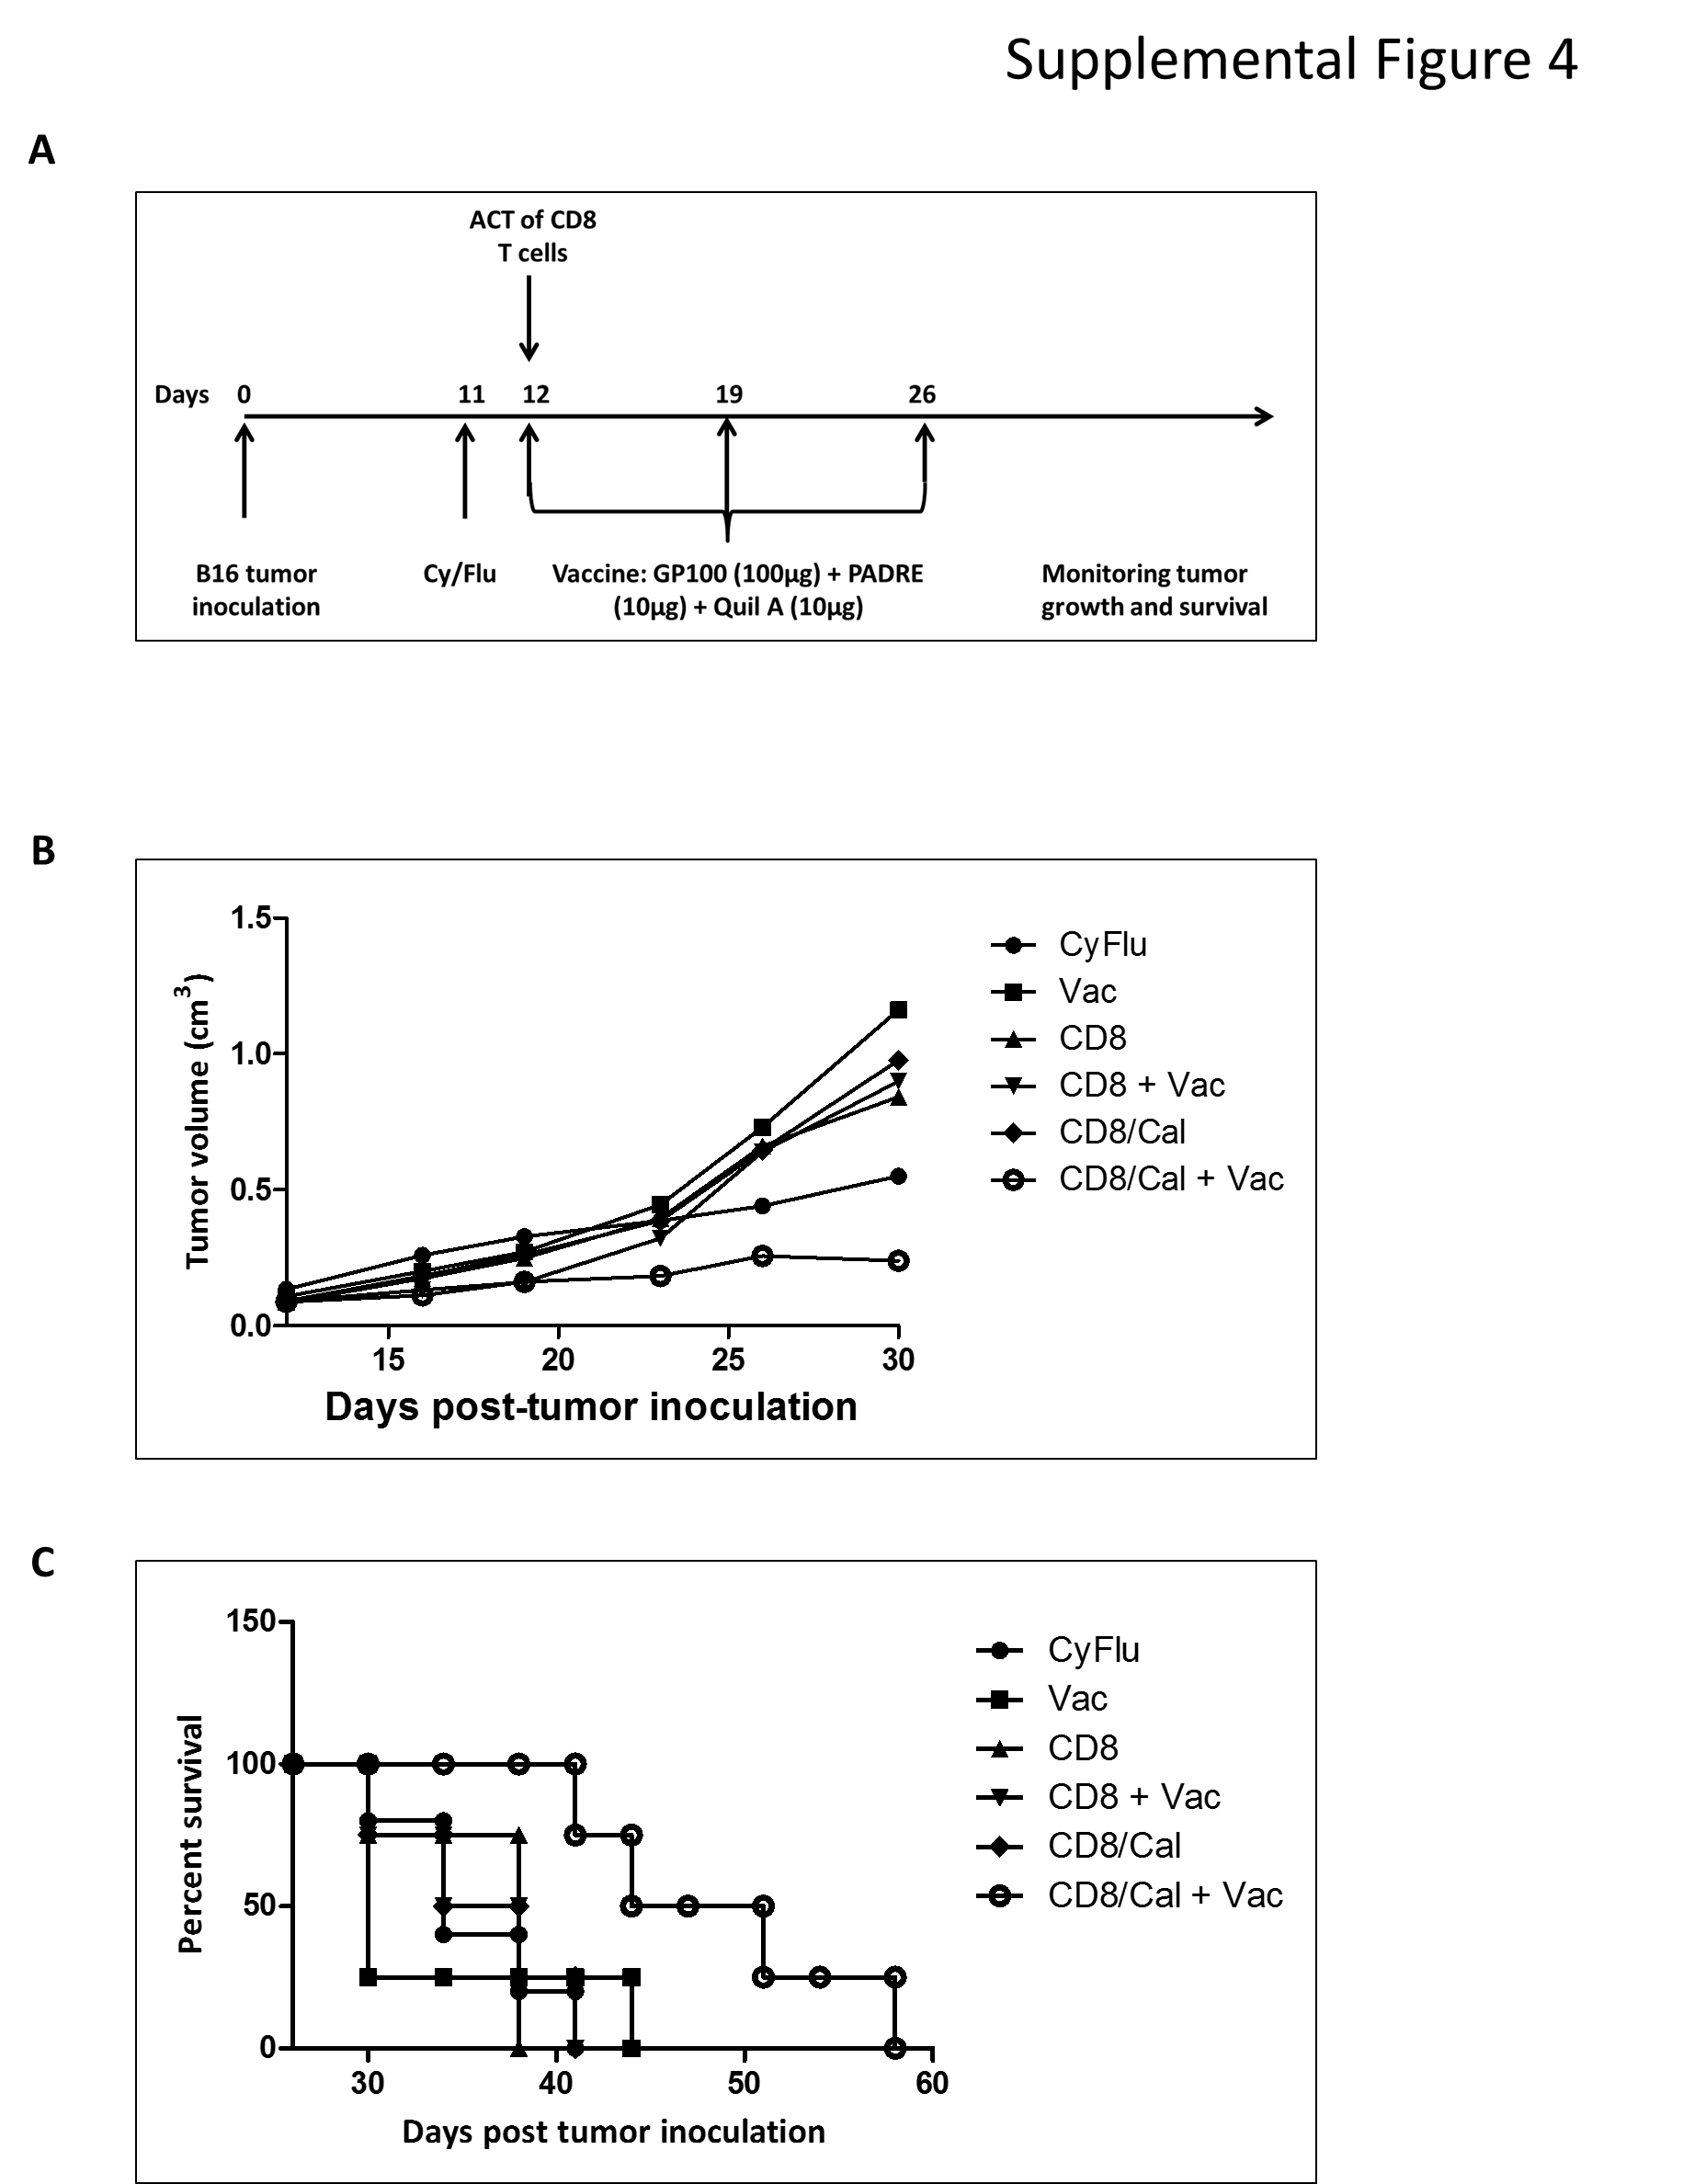


**Supplemental Figure 4:** The inhibition of PI3K-δ in CD8+ T-cells significantly enhances their anti-tumor therapeutic ability *in vivo.* Mice were implanted with B16 in the right flank on day 0. On day 11, mice were lymphodepleted with CyFlu and on Day 12, 1 million CD8+ T-cells from pMel-1 mice cultured in the presence or absence of CAL-101 were adoptively transferred. The appropriate groups were vaccinated with gp100/PADRE/Quil A vaccine on day 12, 19 and 26. Animal survival and tumor growth was monitored. Vac-vaccine (n=4), CyFlu-cycophosphamide/fludarabine (n=5), CyFlu + Vac - cycophosphamide/fludarabine + Vaccine (n=4), CD8- ACT of non-treated CD8 (n=4), CD8 + Vac –ACT of non-treated CD8 + vaccine (n=4), CD8/Cal-ACT of CD8+ Treated with CAL-101 (n=4), CD8/Cal + Vac- ACT of CD8+ Treated with CAL-101 + Vaccine (n=4). All mice that received ACT were lymphodepleted with Cy/Flu.

1. Treatment Schedule
2. Mean tumor volume for different groups. The combination of ACT of CAL-101 treated cells with the vaccine slowed down tumor growth.
3. The Kaplan-Meier plot depicts overall survival. The combination of ACT of CAL-101 treated cells with the vaccine significantly prolonged survival.
