# Supplementary material for: Enhanced Therapeutic Efficacy and Memory of Tumor-Specific CD8 T Cells by Ex Vivo PI3K-δ Inhibition
Source: Oxford University Press journal article supplement (doi:10.1158/0008-5472.can-16-1925), 2017-06-14
Supplement: 00085472can161925-sup-169095_3_unknown_upload_4057064_8q8ykg.docx [file 00085472can161925-sup-169095_3_unknown_upload_4057064_8q8ykg.docx]

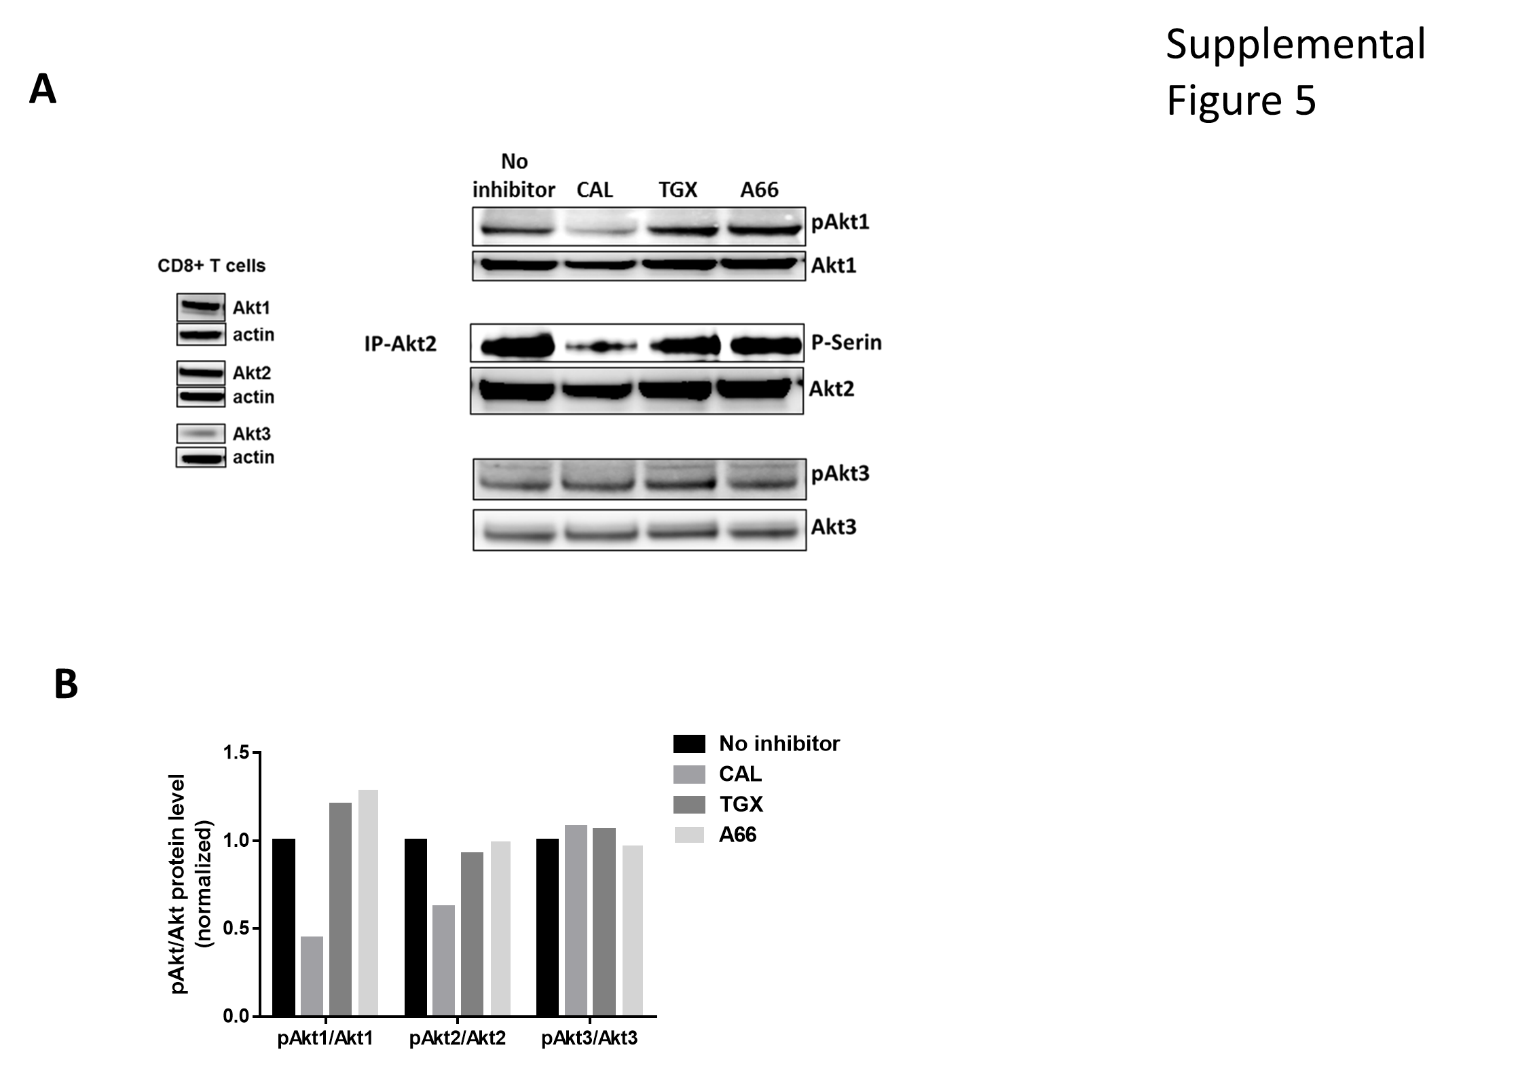


**Supplemental Figure 5:** PI3K-δ controls the differentiation of CD8 T-cells through the downstream Akt1 and Akt2. FACS sorted CD8 T-cells from WT mice were activated in the presence or absence of A66 (288nM), TGX-221 (45nM) or CAL-101(202.5nM). The expression level of Akt1, Akt2 and Akt3 and the phosphorylation of these isoforms was assessed after three days of activation.

1. The phosphorylation of Akt1 and Akt2 was significantly reduced in the presence of PI3K-δ inhibitor, however the inhibition of PI3K-α or PI3K-β had no effect. Akt3 phosphorylation was not affected by the presence of any of the inhibitors.
2. Densitometry of phosphorylated Akt isoform levels to the total Akt isoform ratio showed significantly lower levels of Akt1 and Akt 2 in the presence of PI3K-δ inhibitor. Densitometry was performed on the gel in A.
