# Supplementary material for: Enhanced Therapeutic Efficacy and Memory of Tumor-Specific CD8 T Cells by Ex Vivo PI3K-δ Inhibition
Source: Oxford University Press journal article supplement (doi:10.1158/0008-5472.can-16-1925), 2017-06-14
Supplement: 00085472can161925-sup-169095_3_unknown_upload_4057065_cqcykh.docx [file 00085472can161925-sup-169095_3_unknown_upload_4057065_cqcykh.docx]

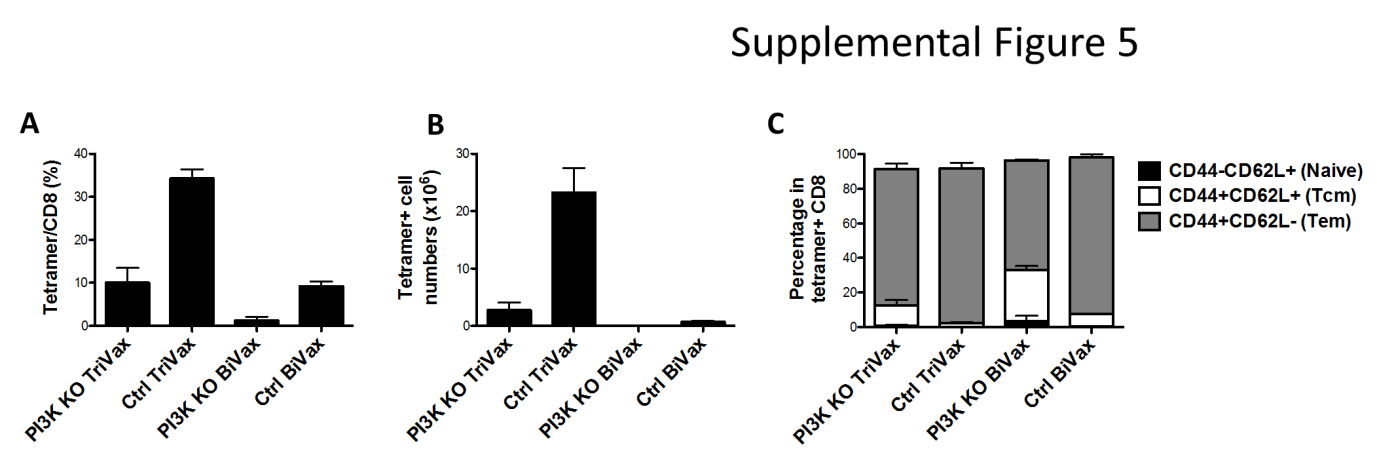


**Supplemental Figure 6:** WT type and PI3K-δ KO mice were injected with BiVax or TriVax vaccines. (BiVax: peptide + poly-IC, TriVax: peptide + anti-CD40 mAb + poly-IC). The composition of splenic tetramer positive CD8+ T-cells was assessed after 7 days of the injection.

1. The percentage of tetramer positive CD8+ T- cells in PI3K-δ KO mice was significantly lower than WT mice
2. The number of tetramer positive CD8+ T-cells in PI3K-δ KO mice was significantly lower than WT mice
3. The percentages of naïve and TCM CD8+ T-cells were significantly higher in PI3K-δ KO mice when compared to WT mice, while the percentage of TEM and terminally differentiated cells was significantly lower.
